# Supplementary material for: Collaborative reconstruction of FeOOH/FeNiCo-LDH heterogeneous nanosheets for enhancing anion exchange membrane seawater electrolysis
Source: Royal Society of Chemistry journal article supplement (doi:10.1039/d4ta08586h), 2025-01-01
Supplement: d4ta08586h1.pdf [file d4ta08586h1.pdf]

## Supporting Information

### **Collaborative Reconstruction of FeOOH/FeNiCo-LDH Heterogeneous Nanosheets for Enhancing Anion Exchange Membrane Seawater Electrolysis**

Yixing Luo,<sup>a</sup> Yang Yang,<sup>b</sup> Yakun Tian,<sup>a</sup> Qingsheng Wu,<sup>a</sup> Wen-Feng Lin<sup>b</sup> and Ming Wen<sup>\*a</sup>

[a] School of Chemical Science and Engineering, Shanghai Key Laboratory of Chemical Assessment and Sustainability, Tongji University, Shanghai, 200092, China

[b] Department of Chemical Engineering, Loughborough University, Loughborough, Leicestershire, LE11 3TU, UK.

\* Corresponding author: Ming Wen (Email: [m\\_wen@tongji.edu.cn](mailto:m_wen@tongji.edu.cn))

## **Experimental section**

### **Fabrication of ZIF-67 and FeOOH/FeNiCo-LDH**

Typically, 30 mL CH<sub>3</sub>OH containing 2.0 mmol Co(NO<sub>3</sub>)<sub>2</sub>·6H<sub>2</sub>O was mixed with 30 mL CH<sub>3</sub>OH containing 8.0 mmol 2-MeIm for 6 h at room temperature to generate ZIF-67. Then, FeOOH/FeNiCo-LDH was prepared according to the similar experimental procedures of FeOOH/FeNiCo-LDH/HCNC, except with the ZIF-67 as precursor.

### **Fabrication of NiCo-LDH/HCNC**

NiCo-LDH/HCNC was prepared according to the similar synthesis procedure of FeOOH/FeNiCo-LDH/HCNC, except without the addition of FeCl<sub>2</sub>·4H<sub>2</sub>O.

## **Characterization**

X-ray diffraction (XRD) patterns were collected using the Bruker D8 advanced X-ray diffractometer with a Cu K $\alpha$  radiation. Scanning electron microscope (SEM, JEOL, S4800) and transmission electron microscope (TEM, JEOL, JEM-2100EX) were used to investigate microstructures of the as-prepared samples. Nitrogen adsorption-desorption isotherms were obtained using the Micromeritics ASAP 3020 instruments operated at 77 K. X-ray photoelectron spectroscopy (XPS) analyses were operated using a Thermo Scientific ESCALAB 250Xi X-ray photoelectron spectrometer with an Al K $\alpha$  source. Inductively coupled plasma-optical emission spectrometry (ICP-OES) was recorded on Perkinelmer ICP Optima 8300 (PE ICP 8300). Raman spectra were obtained using a RENISHAW Via Raman Microscope with the excitation source of

laser wavelength of 514 nm. *In-situ* Raman spectra were collected on a Horiba LabRAM HR Evolution with the excitation source of laser wavelength of 532 nm. *In-situ* Raman measurements were carried out in a custom-made spectro-electrochemical cell under controlled potentials. A Hg/HgO and a graphite rod were used as reference electrode and counter electrode, respectively.

### **DFT calculations**

Structural models of FeOOH/FeNiCo-LDH, FeNiCoOOH, NiCo-LDH, and NiCoOOH were constructed for DFT calculations. NiCo-LDH was constructed based on Ni-LDH (002). Three OH vacancies were introduced to expose reactive sites and four hydrogen atoms were removed on surface to maintain balance of valence electrons. (Lattice parameters of NiCo-LDH:  $a = 12.25612\text{\AA}$ ,  $b = 10.52013\text{\AA}$ ,  $c = 24.50260\text{\AA}$ ). NiCoOOH was constructed based on  $\beta$ -FeOOH (200). Fe atoms were replaced with Ni atoms, then one Ni atom was replaced with Co atom. Twelve oxygen vacancies were introduced to maintain balance of valence electrons. (Lattice parameters of NiCoOOH:  $a = 12.049482\text{\AA}$ ,  $b = 10.325105\text{\AA}$ ,  $c = 30.000\text{\AA}$ ). FeNiCoOOH was constructed based on  $\beta$ -FeOOH (200). Twelve oxygen vacancies were introduced to maintain balance of valence electrons. (Lattice parameters of FeNiCoOOH:  $a = 12.154175\text{\AA}$ ,  $b = 10.155464\text{\AA}$ ,  $c = 30.000\text{\AA}$ ). FeOOH/FeNiCo-LDH heterostructure was constructed based on FeOOH (200) and FeNiCo-LDH (002). Then one Ni atom was replaced with Co atom. Three OH vacancies were introduced to expose reactive sites and seven hydrogen atoms were removed on surface to maintain balance of valence electrons.

(Lattice parameters of FeOOH/FeNiCo-LDH:  $a = 12.203786\text{\AA}$ ,  $b = 10.380383\text{\AA}$ ,  $c = 30.000\text{\AA}$ ).

Structural optimization was performed by Vienna Ab-initio Simulation Package (VASP) with the projector augmented wave (PAW) method [S1, S2]. The exchange-functional was treated using the Perdew-Burke-Ernzerhof (PBE) functional, in combination with the DFT-D3 correction [S3, S4]. Cut-off energy of the plane-wave basis was set as 450 eV. For optimization of both geometry and lattice size, the Brillouin zone integration was performed with Monkhorst-Pack k-point sampling of  $2 \times 2 \times 1$  [S5]. The self-consistent calculations applied a convergence energy threshold of  $10^{-5}$  eV. The equilibrium geometries and lattice constants were optimized with maximum stress on each atom within  $0.02 \text{ eV \AA}^{-1}$ . The spin polarization method was adopted to describe magnetism of structural models. Isosurface level of charge density difference of FeOOH/FeNiCo-LDH was set at  $0.02 \text{ e \AA}^{-3}$ . The Hubbard U correction was added to describe strong interactions of 3d orbitals, where  $U_{\text{Fe}} = 4.0 \text{ eV}$ ,  $U_{\text{Ni}} = 6.4 \text{ eV}$ ,  $U_{\text{Co}} = 3.3 \text{ eV}$  [S6-S8].

The adsorption model by employing the computational hydrogen electrode (CHE) model was adopted for the calculation of Gibbs free energy [S9]. The Gibbs free energy of H atom was calculated according to  $\frac{1}{2} \text{H}_2 \rightarrow \text{H}^+ + \text{e}^-$ , where  $G(\text{H}^+) = \frac{1}{2} G(\text{H}_2)$ . And the dehydrogenation process of NiCo-LDH was described as single site pathway:

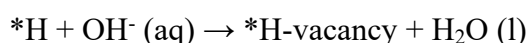

Elementary steps of OER on FeNiCoOOH and NiCoOOH were described as dual sites pathway [S10]:

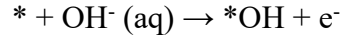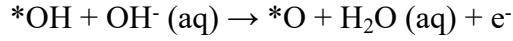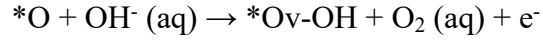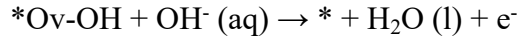

In the above reactions, \* represents the bare surface of structural models. \*i represents the surface of structural models adsorbing intermediate i. Gibbs free energy of intermediate i was calculated as  $G = E + G(\text{T}) + 0.0592 \text{ pH} - eU$ . E represents the total energy of structural models. G(T) represents the thermal correction of Gibbs free energy of \*i. Kelvin temperature T was set at 298.15 K. The applied potentials U was set at 0 and 1.23 V. Gibbs free energy of OH<sup>-</sup> and O<sub>2</sub> in their aqueous phase were obtained based on standard molar free energy of formation and standard hydrogen electrode (SHE) [S11]. G(T) of \*i was obtained by VASPKIT interface [S12].

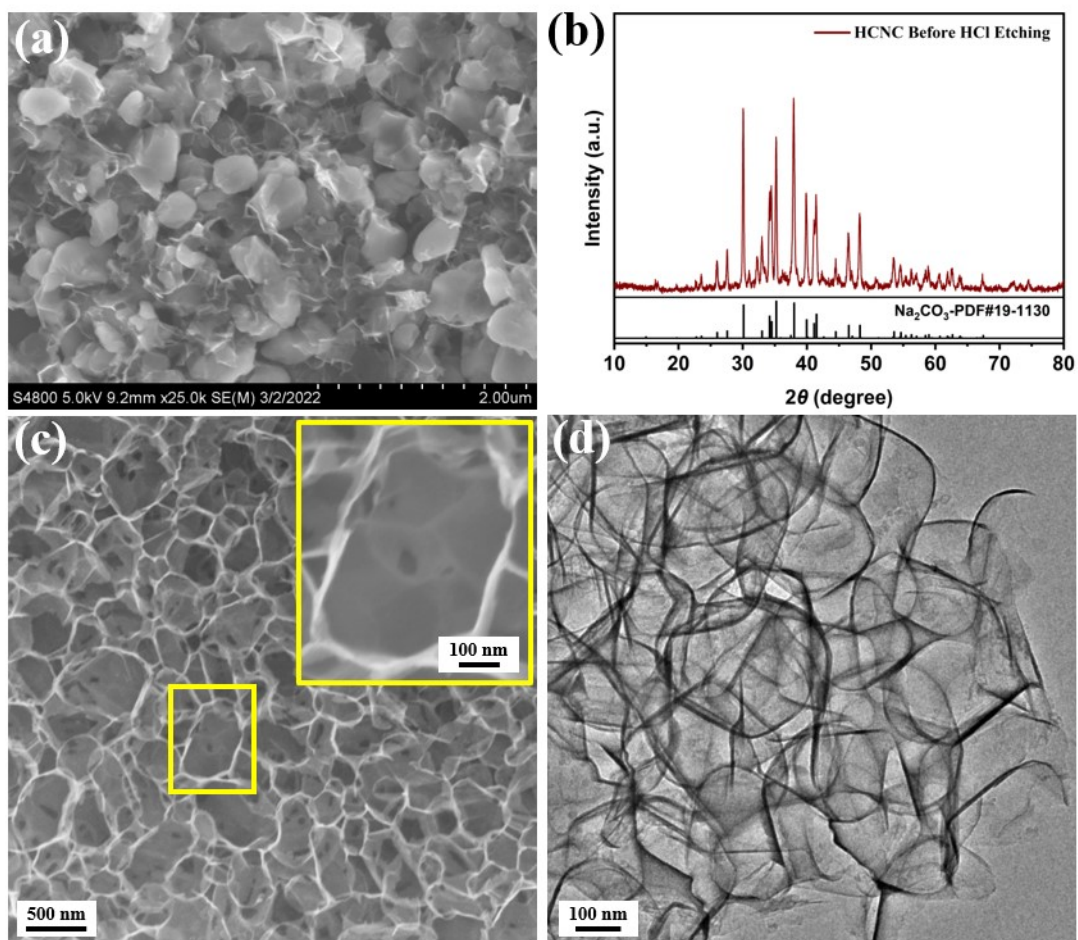

**Fig. S1.** (a) SEM image and (b) XRD pattern of HCNC before HCl etching. (c) SEM image and (d) TEM image of HCNC.

HCNC displays typical honeycomb-channel structure with plenty mesoporous on the carbon wall to connect each cavity, which is favorable for facilitating the mass transfer efficiency during electrochemical reaction.

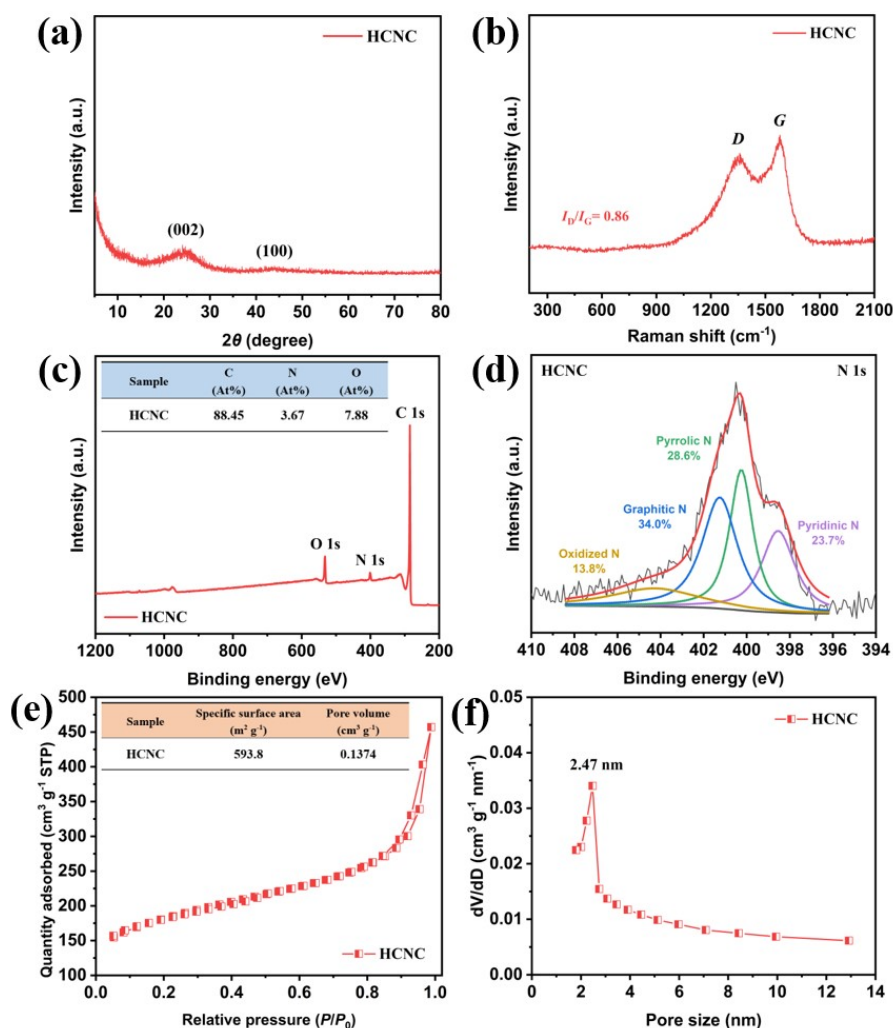

**Fig. S2.** (a) XRD pattern, (b) Raman spectra, and (c) Survey XPS spectra of HCNC. (d) High-resolution XPS spectra of N 1s in HCNC. (e) Nitrogen adsorption-desorption isotherms and (f) corresponding pore diameter distribution curves of HCNC.

HCNC presents two broad diffraction peaks centered around  $2\theta = 25^\circ$  and  $44^\circ$  corresponding to the (002) and (100) plane of graphite carbon (**Fig. S2a**), respectively. Raman spectra (**Fig. S2b**) further confirm the high graphitization degrees of HCNC ( $I_D/I_G = 0.86$ ), which is favorable for enhancing the electron migrate capacity during electrochemical reaction.

HCNC is composed of C (284.8 eV), N (400.5 eV), and O (532.2 eV) (**Fig. S2c**). And the deconvoluted peak of N 1s is divided into pyridinic N (398.5 eV), pyrrolic N (400.3 eV), graphitic N (401.3 eV), and oxidized N (404.3 eV) species (**Fig. S2d**), respectively. The multifarious nitrogen species and abundant nitrogen content (3.67 At%) provide numerous C-N<sub>x</sub> sites for the stabilization of fish scale-like FeOOH/FeNiCo-LDH nanosheets on HCNC substrates.

HCNC possesses large specific surface areas of  $593.8 \text{ cm}^2 \text{ g}^{-1}$  and rich mesopores of 2.47 nm (**Fig. S2e and Fig. S2f**), which provides numerous available sites for the stabilization of fish scale-like FeOOH/FeNiCo-LDH nanosheets.

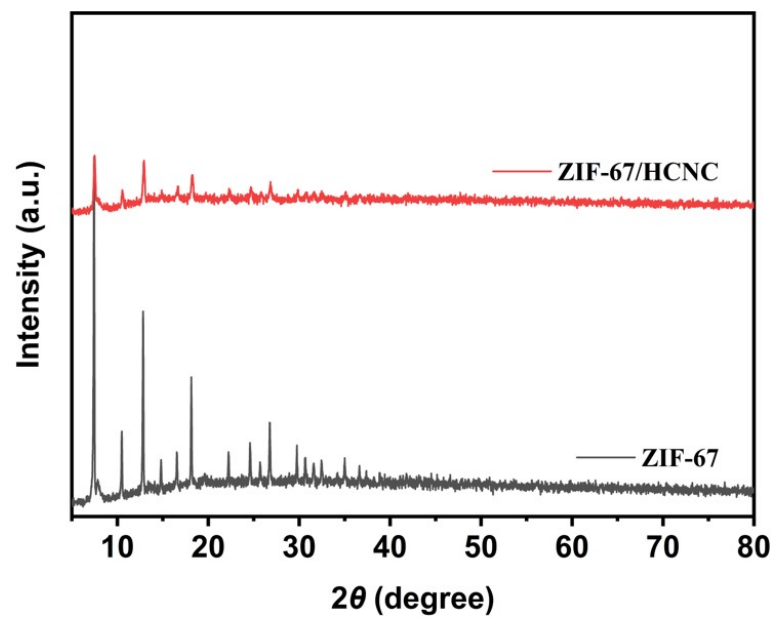

**Fig. S3.** XRD patterns of ZIF-67 and ZIF-67/HCNC.



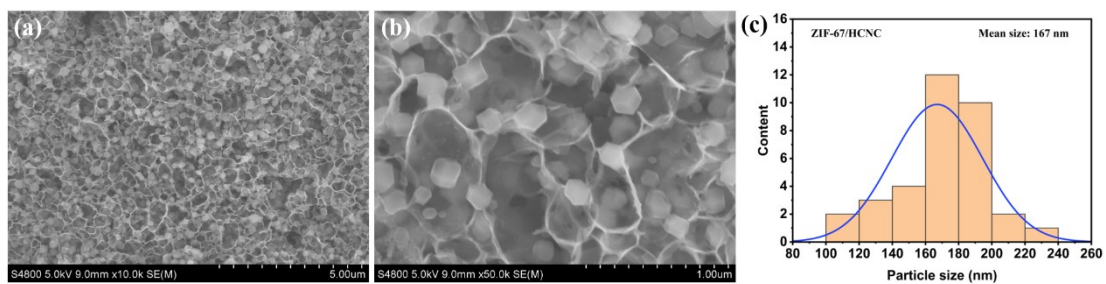

**Fig. S4.** (a, b) SEM images and (c) ZIF-67 size distribution of ZIF-67/HCNC.

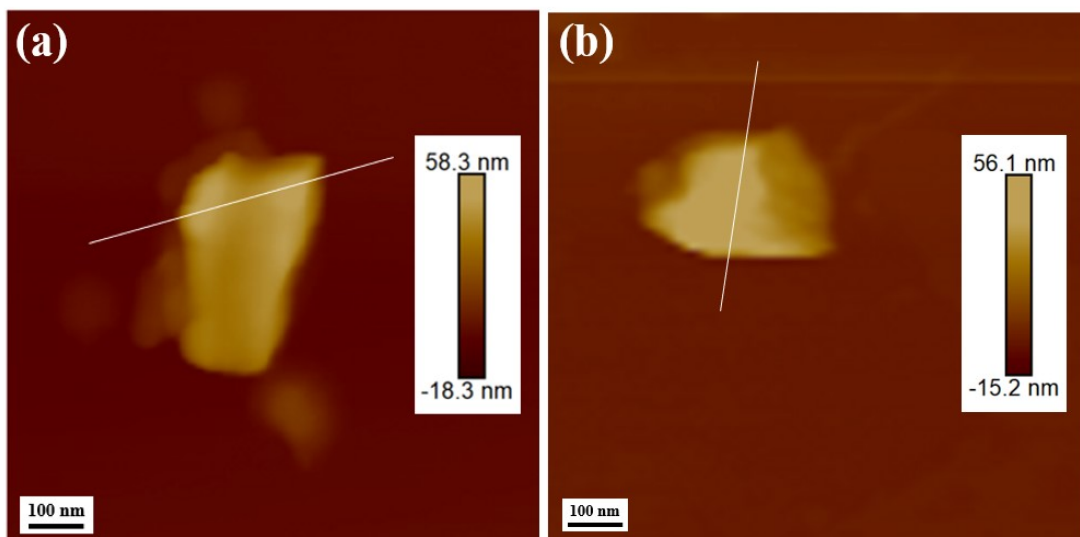

**Fig. S5.** Atomic force microscope image of (a) FeOOH/FeNiCo-LDH/HCNC and (b) HCNC.

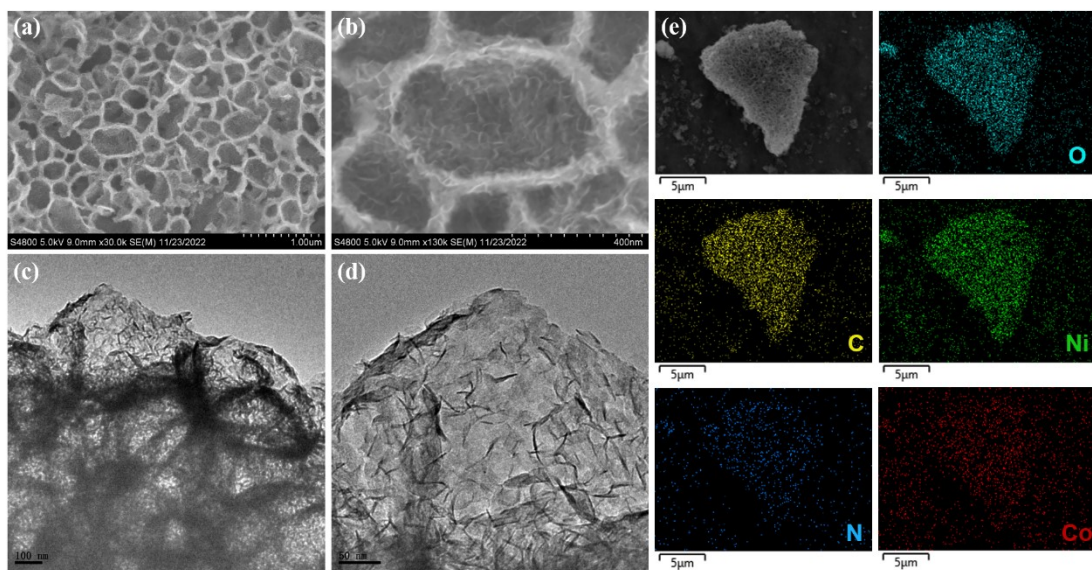

**Fig. S6.** (a, b) SEM images, (c, d) TEM images, and (e) Elemental mappings of NiCo-LDH/HCNC.

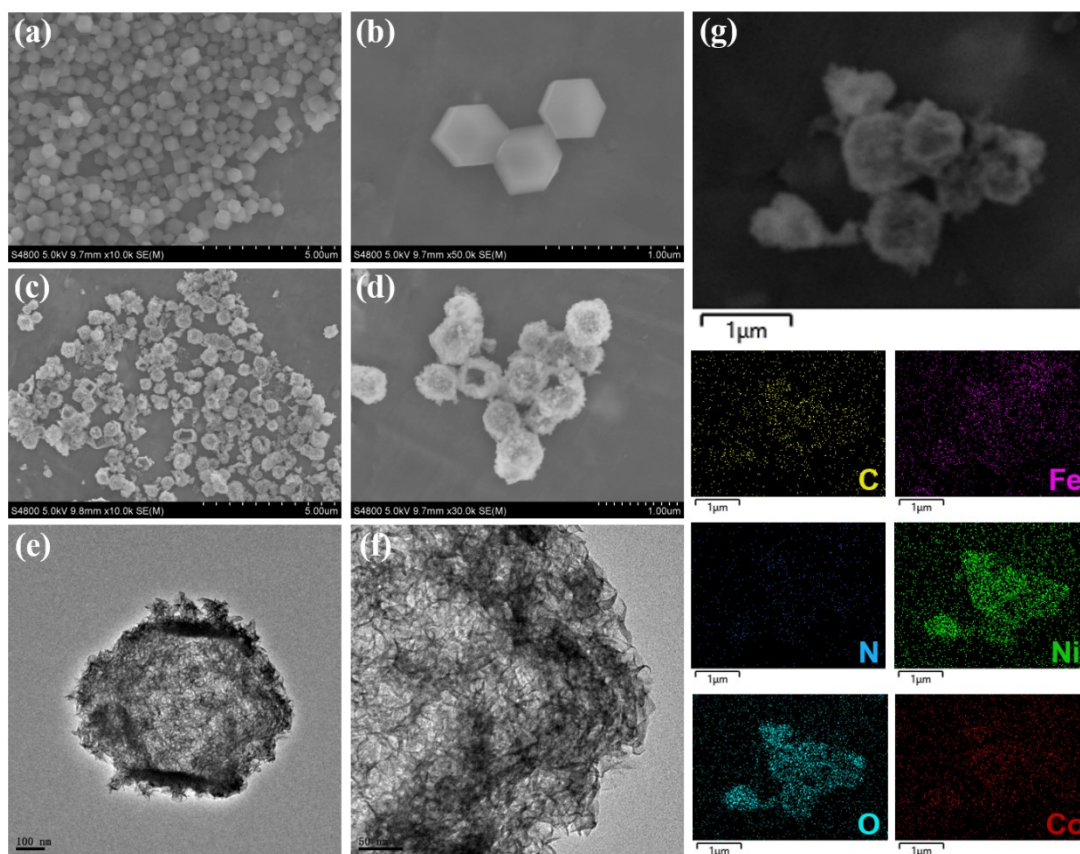

**Fig. S7.** (a, b) SEM images of ZIF-67. (c, d) SEM images, (e, f) TEM images, and (g) Elemental mappings of FeOOH/FeNiCo-LDH.

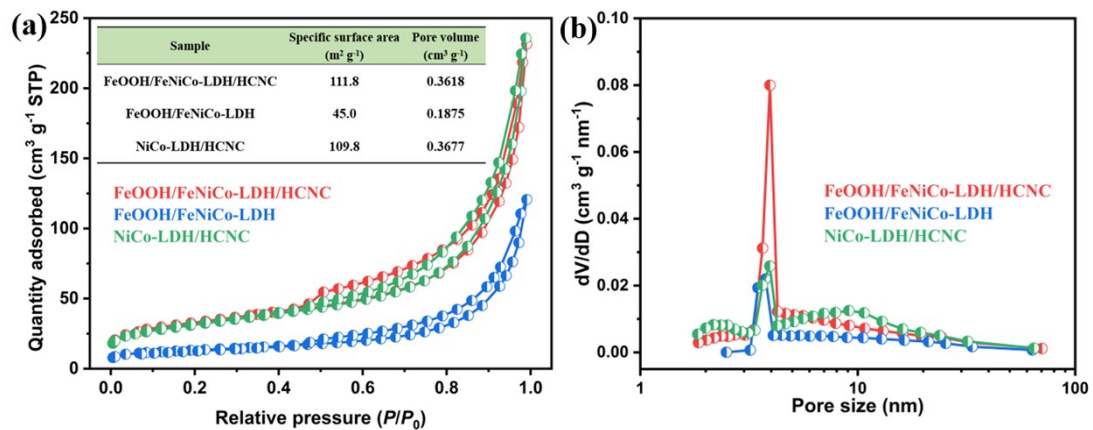

**Fig. S8.** (a) Nitrogen adsorption-desorption isotherms and (b) corresponding pore diameter distribution curves of FeOOH/FeNiCo-LDH/HCNC and its comparative samples.

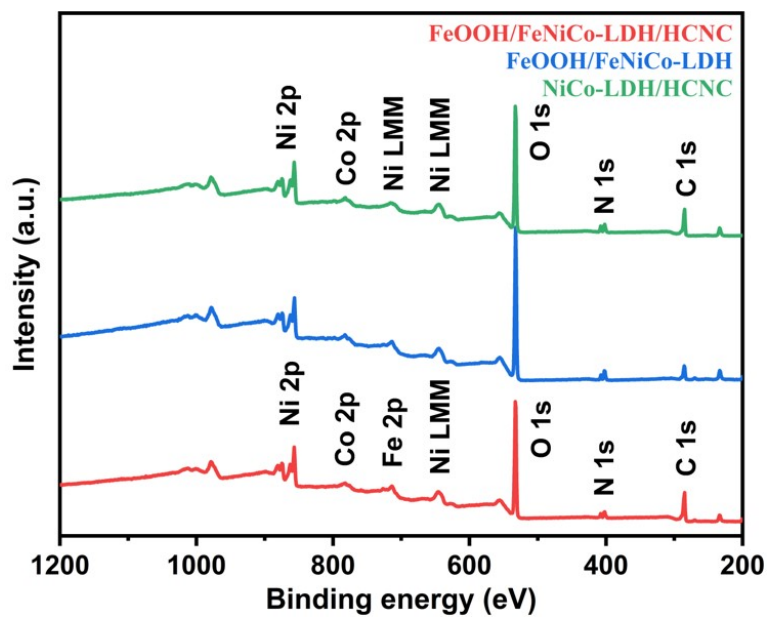

**Fig. S9.** Survey XPS spectra of FeOOH/FeNiCo-LDH/HCNC and its comparative samples.

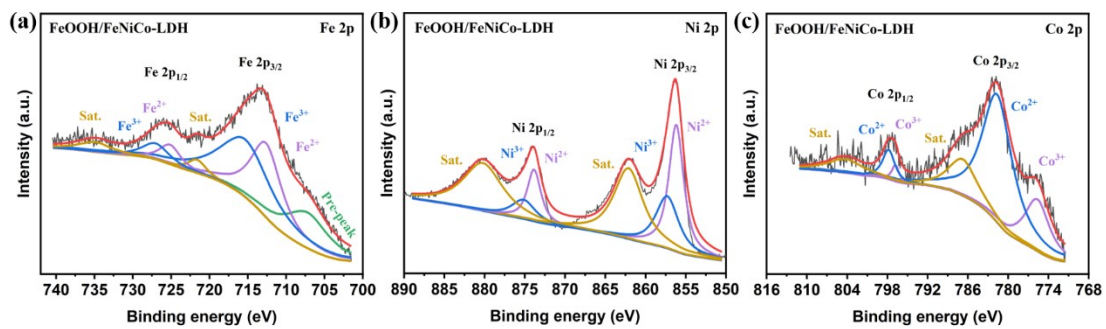

**Fig. S10.** High-resolution XPS spectra of (a) Fe 2p (b) Ni 2p, and (c) Co 2p in FeOOH/FeNiCo-LDH.

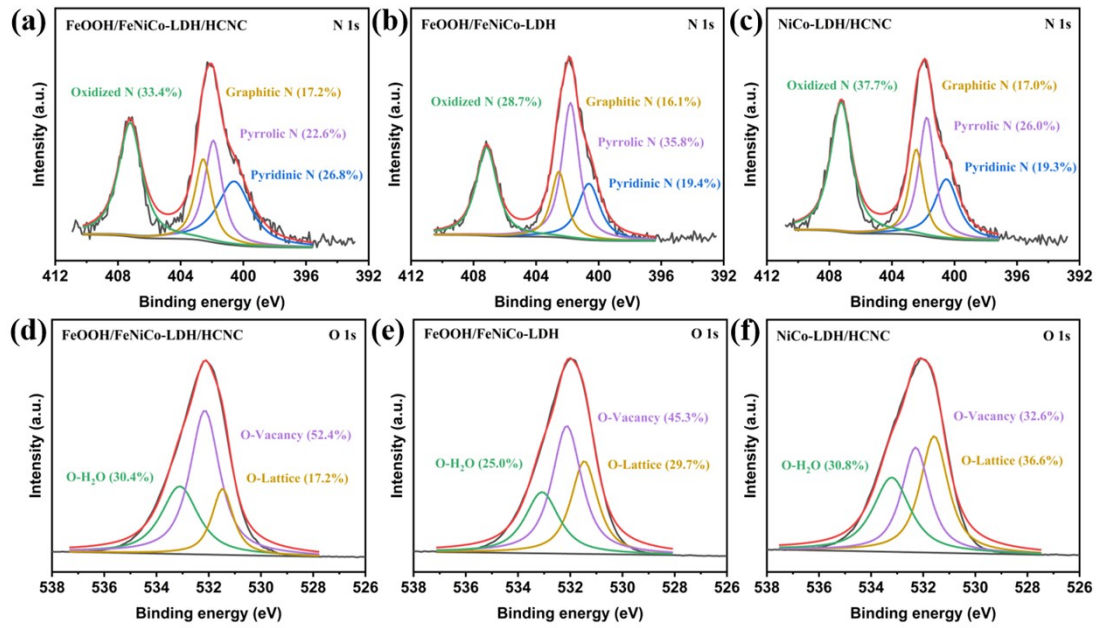

**Fig. S11.** High-resolution XPS spectra of (a-c) N 1s and (d-f) O 1s in FeOOH/FeNiCo-LDH/HCNC and its comparative samples.



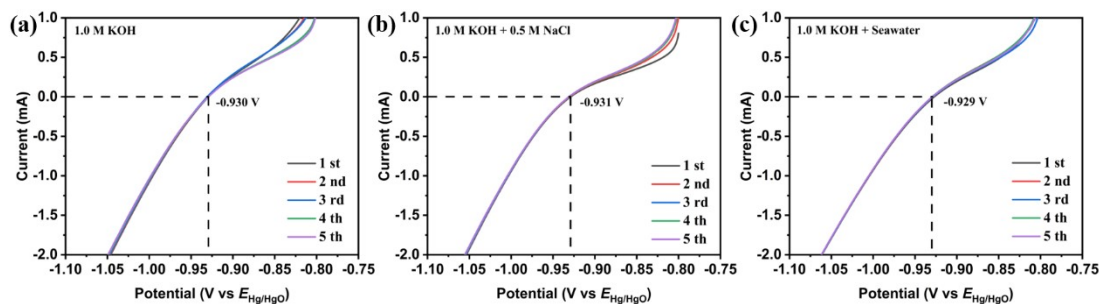

**Fig. S12.** LSV curves for the calibration of Hg/HgO reference electrode in (a) 1.0 M KOH, (b) 1.0 M KOH + 0.5 M NaCl, and (c) 1.0 M KOH + seawater.

For the conversion of electrode potentials quoted against the reversible hydrogen electrode (RHE), the reference electrode employed in the experiments was experimentally calibrated with respect to RHE. The calibration was conducted in the high-purity hydrogen saturated electrolytes (1.0 M KOH, 1.0 M KOH + 0.5 M NaCl, and 1.0 M KOH + seawater) with a Pt wire as the working electrode and a Pt foil as the counter electrode. LSV curves were performed at a scan rate of  $1 \text{ mV s}^{-1}$  for five times (**Fig. S12**), and the average of the five potentials at which the current crossed zero was taken to be the thermodynamic potential for the hydrogen electrode reactions, and the following equation was applied:

For 1.0 M KOH:

$$E_{\text{RHE}} = E_{\text{Hg/HgO}} + 0.930 \text{ V}$$

For 1.0 M KOH + 0.5 M NaCl:

$$E_{\text{RHE}} = E_{\text{Hg/HgO}} + 0.931 \text{ V}$$

For 1.0 M KOH + seawater:

$$E_{\text{RHE}} = E_{\text{Hg/HgO}} + 0.929 \text{ V}$$

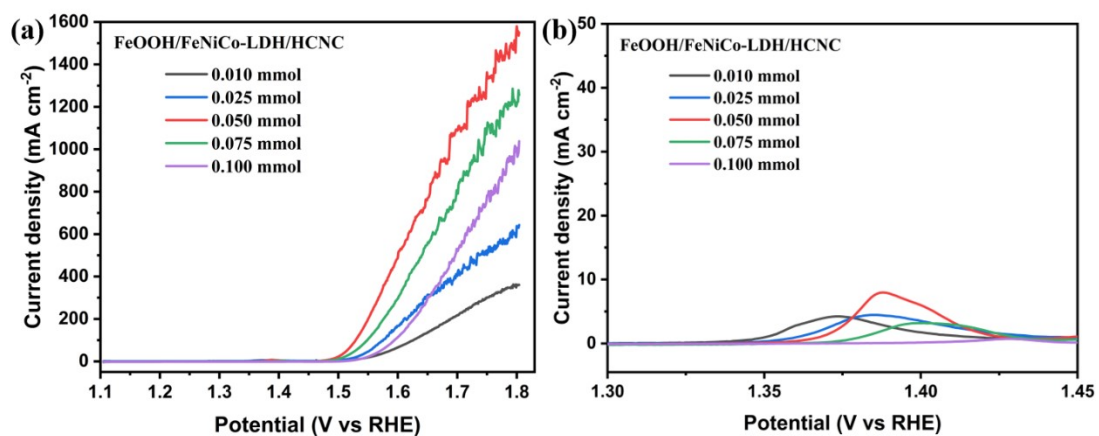

**Fig. S13.** (a) LSV curves and (b) corresponding enlarged LSV curves for OER in 1.0 M KOH of FeOOH/FeNiCo-LDH/HCNC prepared with different Fe<sup>2+</sup> dosage.

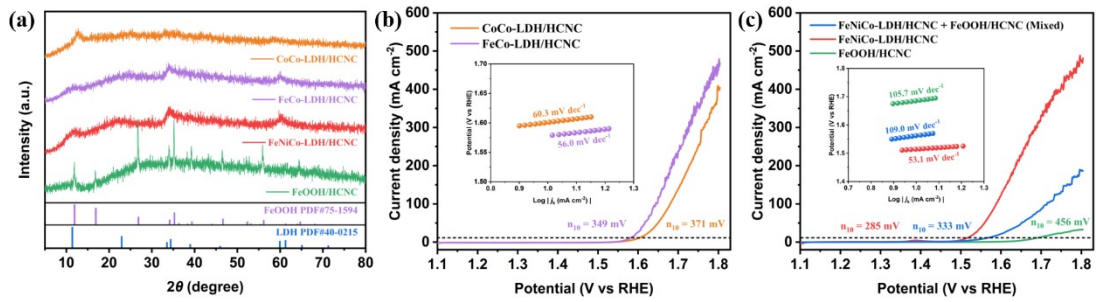

**Fig. S14.** (a) XRD pattern and (b, c) LSV curves for OER in 1.0 M KOH of different samples.

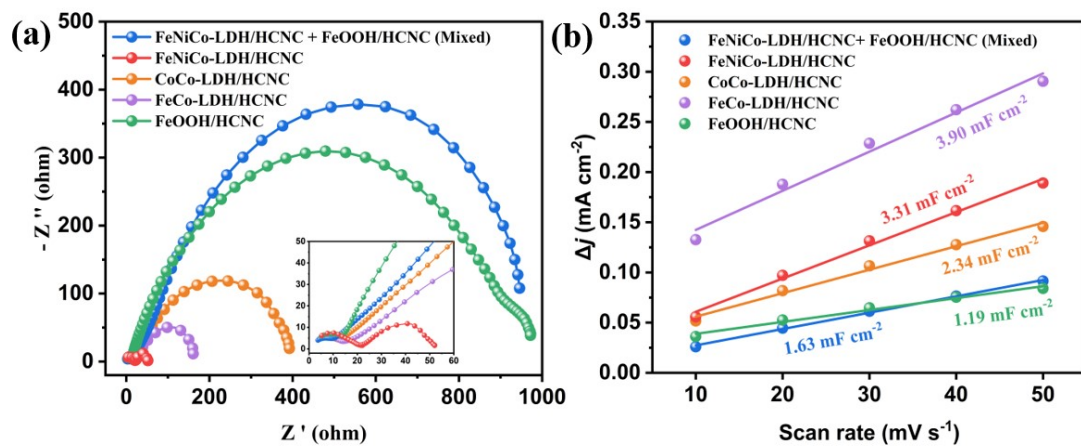

**Fig. S15.** (a)  $C_{dl}$  values and (b) Nyquist plots of CoCo-LDH/HCNC, FeCo-LDH/HCNC, FeNiCo-LDH/HCNC, FeOOH/HCNC, and FeNiCo-LDH/HCNC+FeOOH/HCNC (Mixed).

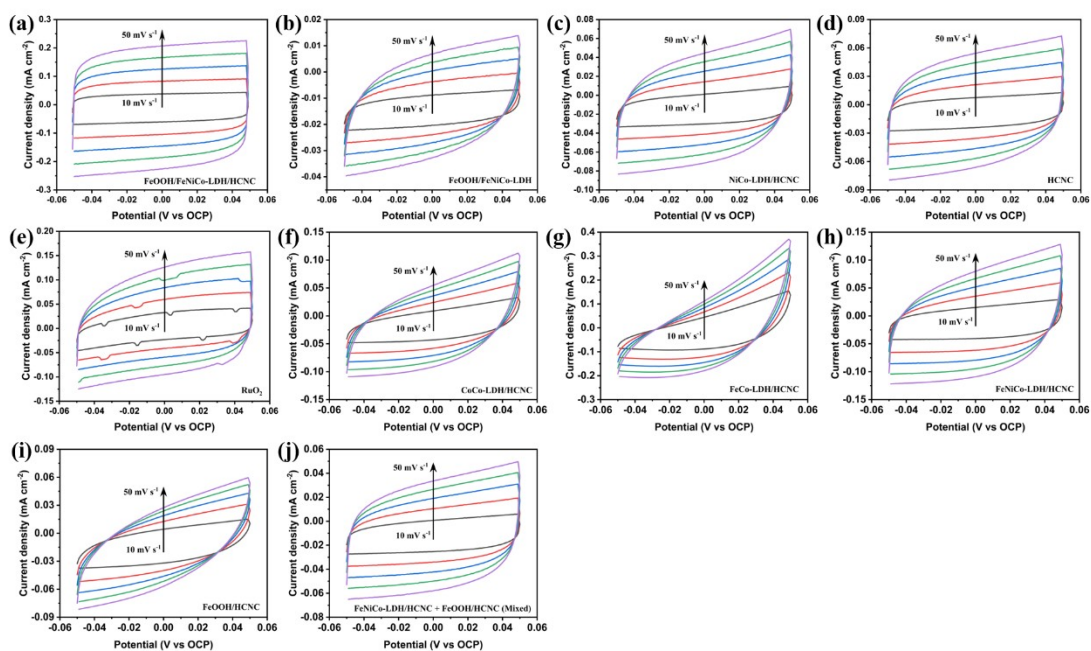

**Fig. S16.** CV curves in non-Faradic region at different scan rates from 10 to 50  $\text{mV s}^{-1}$  of (a) FeOOH/FeNiCo-LDH/HCNC, (b) FeOOH/FeNiCo-LDH, (c) NiCo-LDH/HCNC, (d) HCNC, (e)  $\text{RuO}_2$ , (f) CoCo-LDH/HCNC, (g) FeCo-LDH/HCNC, (h) FeNiCo-LDH/HCNC, (i) FeOOH/HCNC, and (j) FeNiCo-LDH/HCNC+FeOOH/HCNC (Mixed).

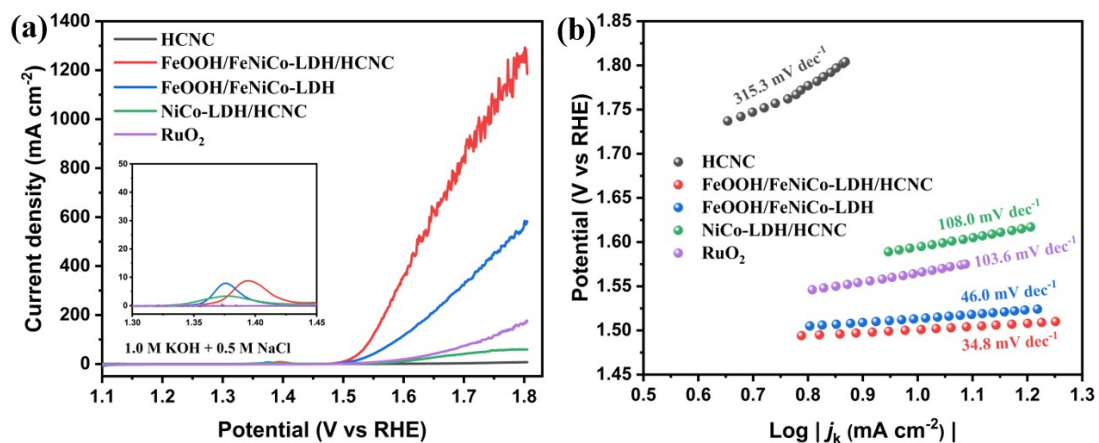

**Fig. 17.** (a) LSV curves and (b) corresponding Tafel plots for OER in 1.0 M KOH + 0.5 M NaCl of FeOOH/FeNiCo-LDH/HCNC and its comparative electrocatalysts.

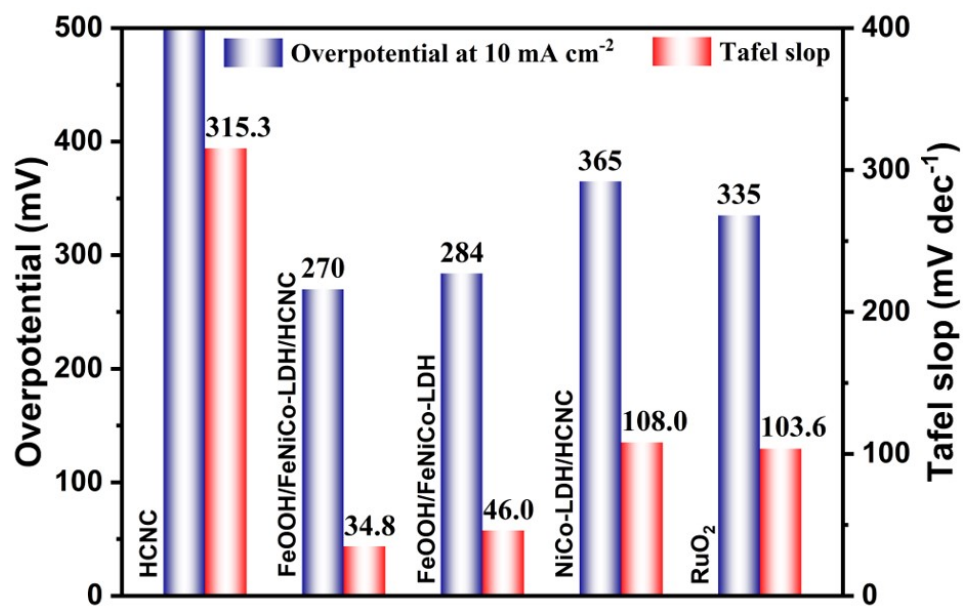

**Fig. S18.** Overpotentials at current density of 10 mA cm<sup>-2</sup> and Tafel slopes for OER in 1.0 M KOH + 0.5 M NaCl of FeOOH/FeNiCo-LDH/HCNC and its comparative electrocatalysts.

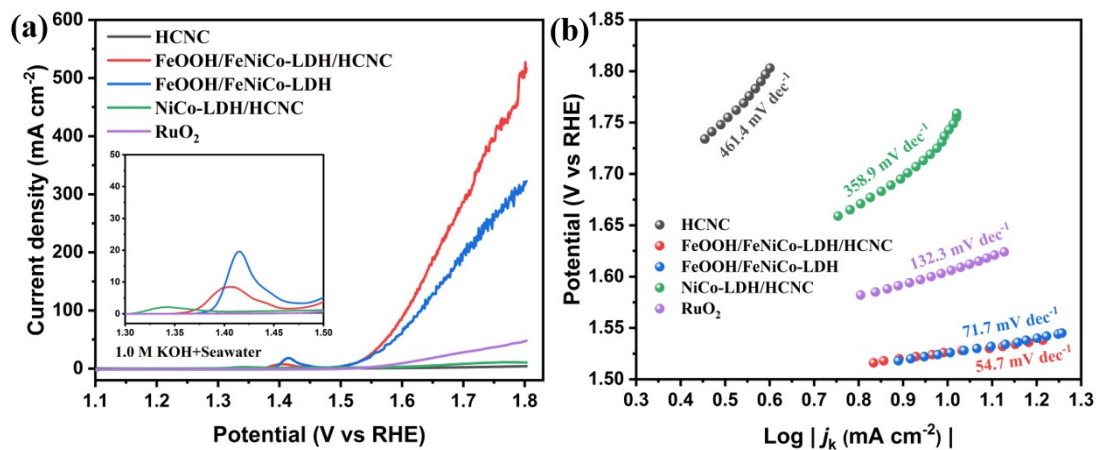

**Fig. 19.** (a) LSV curves and (b) corresponding Tafel plots for OER in 1.0 M KOH + seawater of FeOOH/FeNiCo-LDH/HCNC and its comparative electrocatalysts.



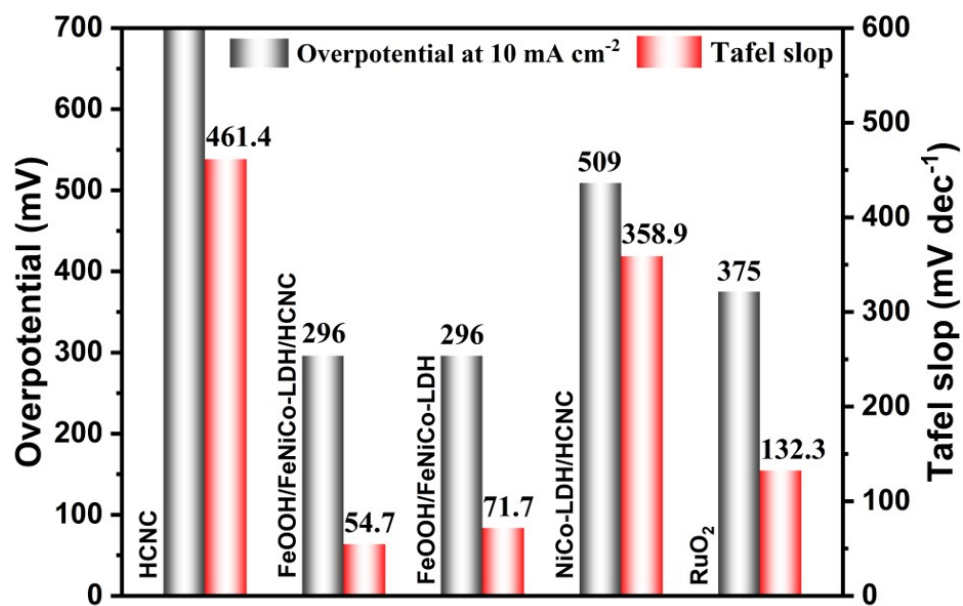

**Fig. S20.** Overpotentials at current density of 10 mA cm<sup>-2</sup> and Tafel slopes for OER in 1.0 M KOH + seawater of FeOOH/FeNiCo-LDH/HCNC and its comparative electrocatalysts.

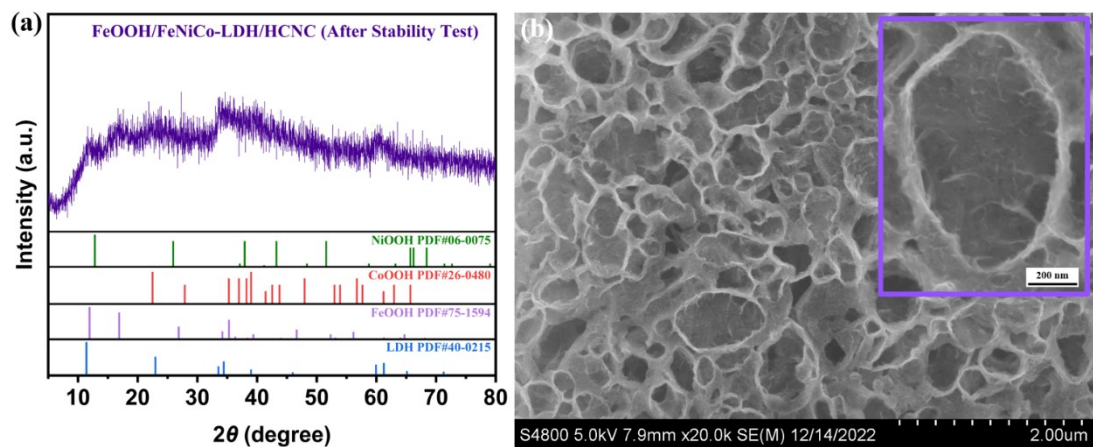

**Fig. S21.** (a) XRD pattern and (b) SEM image of FeOOH/FeNiCo-LDH/HCNC after OER stability test.

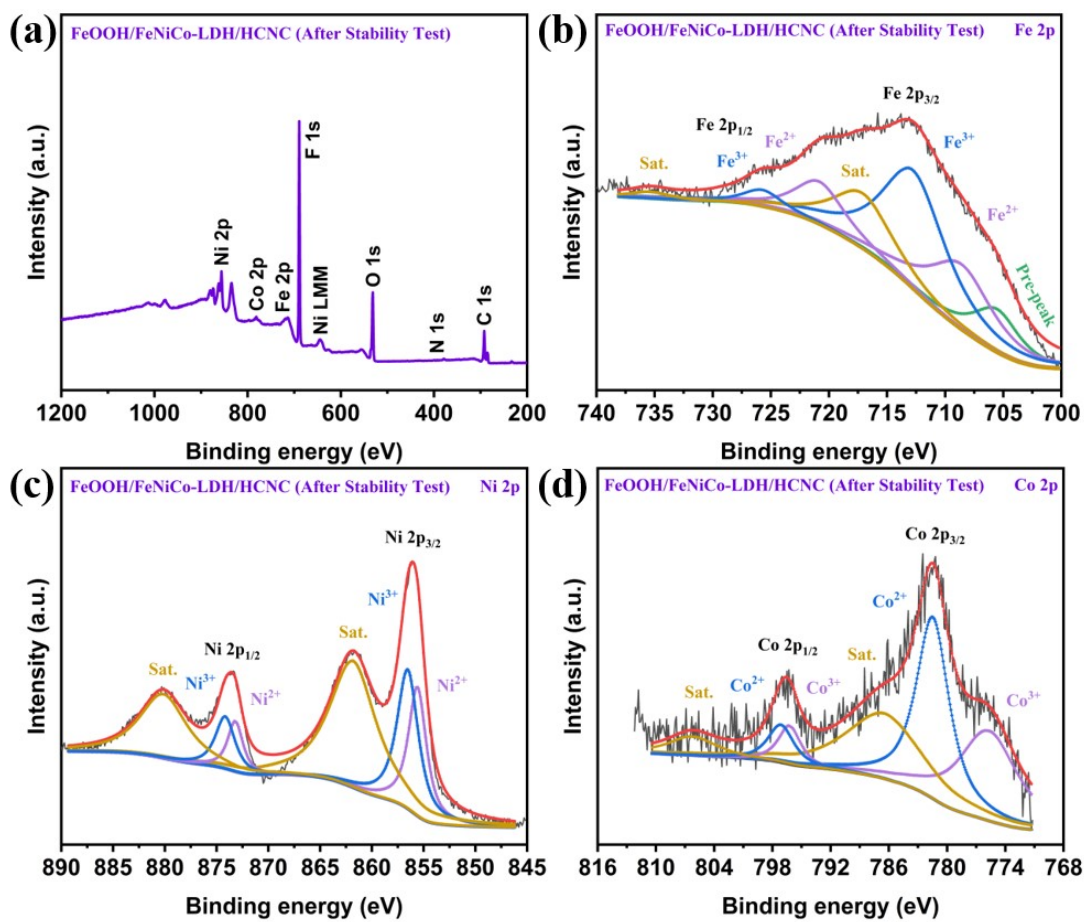

**Fig. S22.** (a) Survey XPS spectra of FeOOH/FeNiCo-LDH/HCNC after OER stability test. High-resolution XPS spectra of (b) Fe 2p, (c) Ni 2p, and (d) Co 2p in FeOOH/FeNiCo-LDH/HCNC after OER stability test.

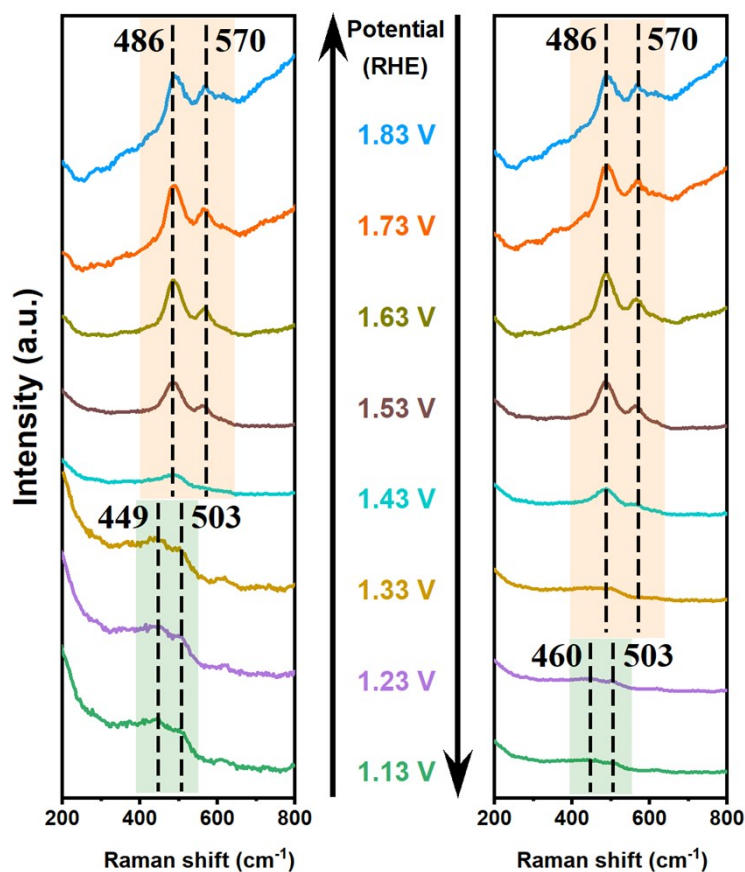

**Fig. S23.** In-situ Raman spectra of NiCo-LDH/HCNC during OER in 1.0 M KOH.

The *in-situ* Raman characterization of NiCo-LDH/HCNC during OER was conducted under the same conditions as FeOOH/FeNiCo-LDH/HCNC. As displayed in **Fig. S23**, during the potential increase process, the pristine Raman peaks at 449 and 503  $\text{cm}^{-1}$  (NiIII/CoII-O in LDH) transformed into new peaks at 486 and 570  $\text{cm}^{-1}$  (NiCoOOH). In the subsequent decrease process, the Raman peaks assigned to NiCoOOH gradually weakens and reversibly returns to NiCo-LDH. Thus, NiCo-LDH/HCNC undergoes the reversible phase reconstruction to form unstable NiCoOOH species during OER.

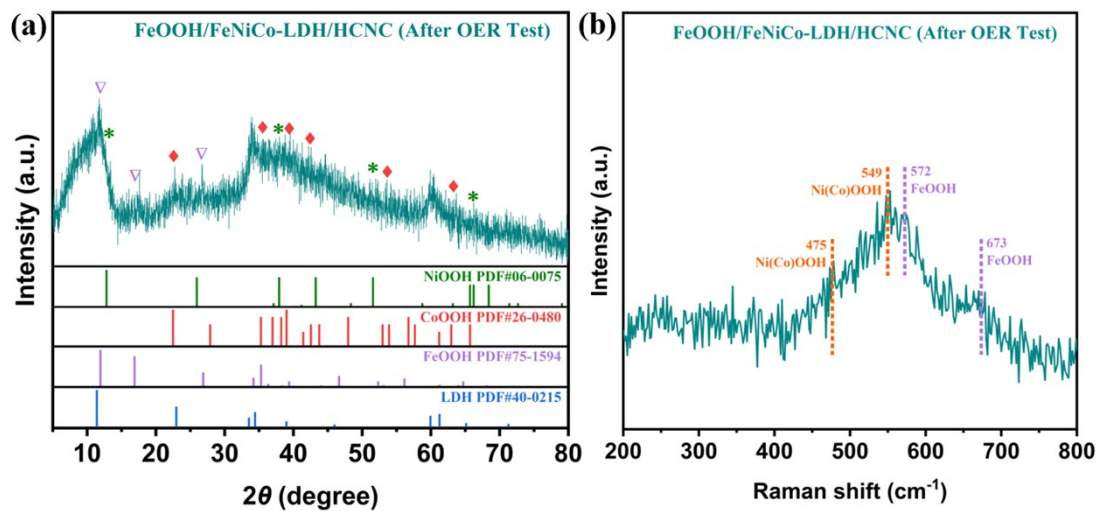

**Fig. S24.** (a) XRD pattern and (b) Raman spectra of FeOOH/FeNiCo-LDH/HCNC after OER test.

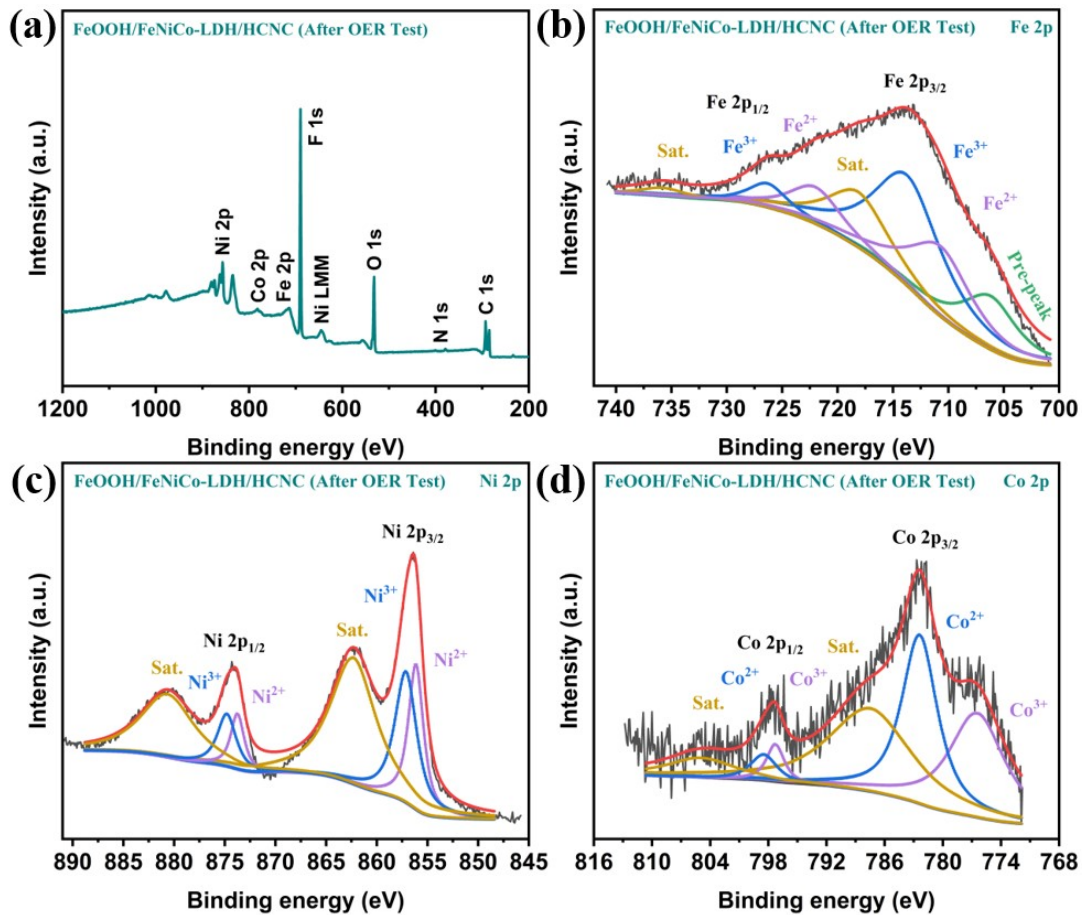

**Fig. S25.** (a) Survey XPS spectra of FeOOH/FeNiCo-LDH/HCNC after OER test. High-resolution XPS spectra of (b) Fe 2p, (c) Ni 2p, and (d) Co 2p in FeOOH/FeNiCo-LDH/HCNC after OER test.

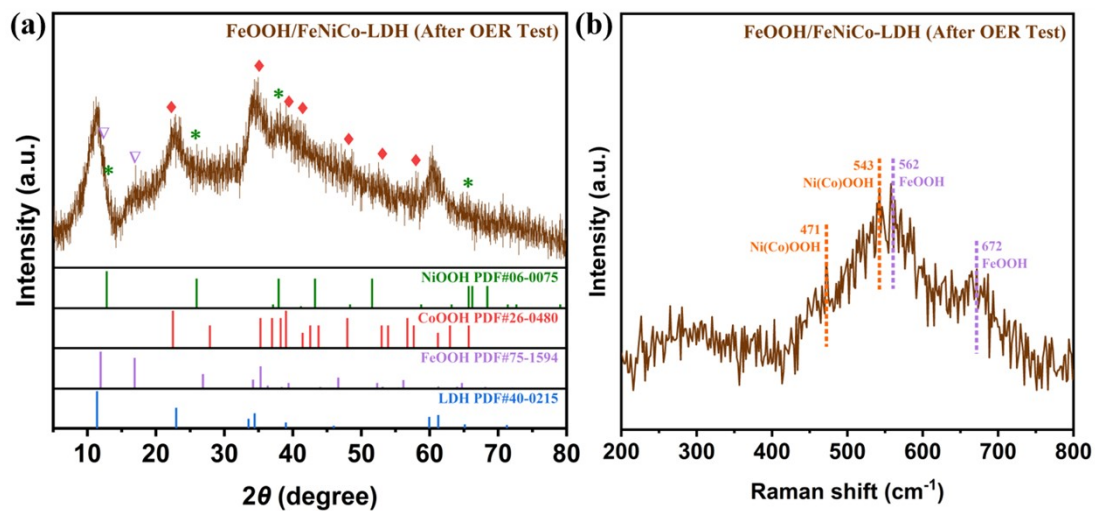

**Fig. S26.** (a) XRD pattern and (b) Raman spectra of FeOOH/FeNiCo-LDH after OER test.

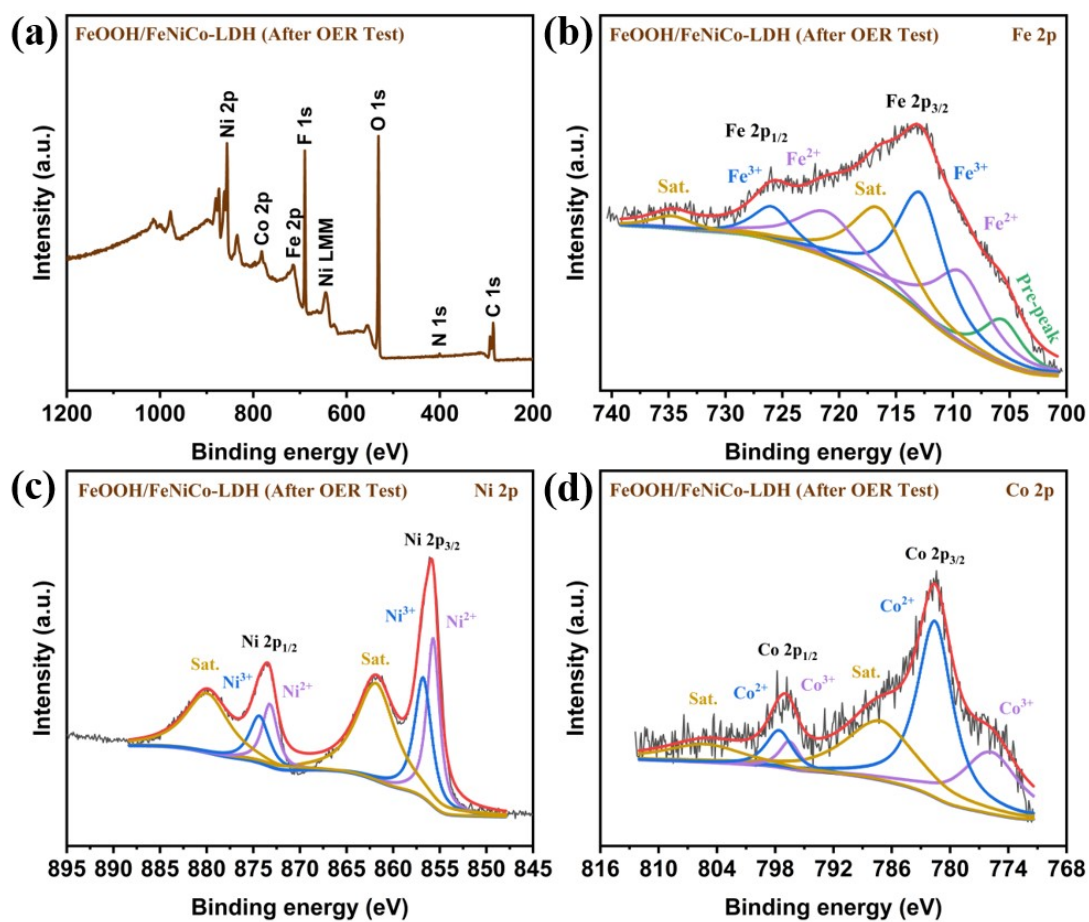

**Fig. S27.** (a) Survey XPS spectra of FeOOH/FeNiCo-LDH after OER test. High-resolution XPS spectra of (b) Fe 2p, (c) Ni 2p, and (d) Co 2p in FeOOH/FeNiCo-LDH after OER test.



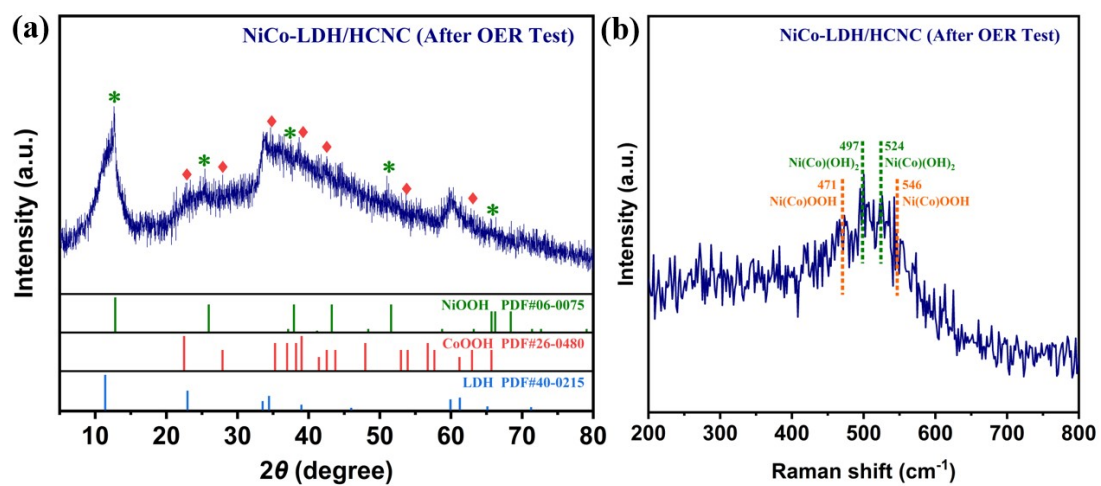

**Fig. S28.** (a) XRD pattern and (b) Raman spectra of NiCo-LDH/HCNC after OER test.

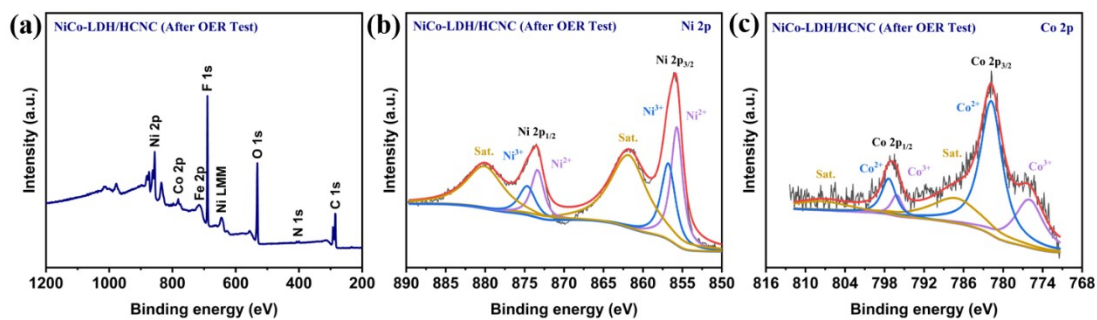

**Fig. S29.** (a) Survey XPS spectra of NiCo-LDH/HCNC after OER test. High-resolution XPS spectra of (b) Ni 2p and (c) Co 2p in NiCo-LDH/HCNC after OER test.

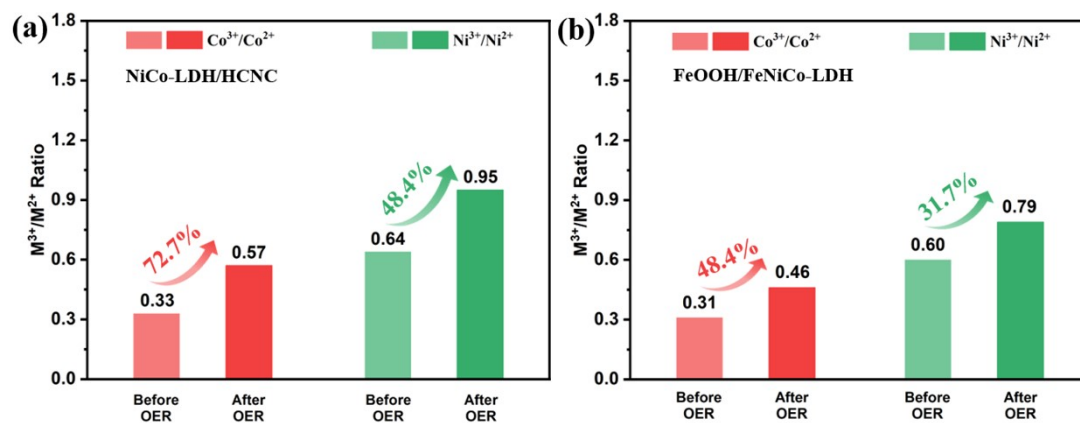

**Fig. S30.**  $M^{3+}/M^{2+}$  ratios in (a) NiCo-LDH/HCNC and (b) FeOOH/FeNiCo-LDH before/after OER test.

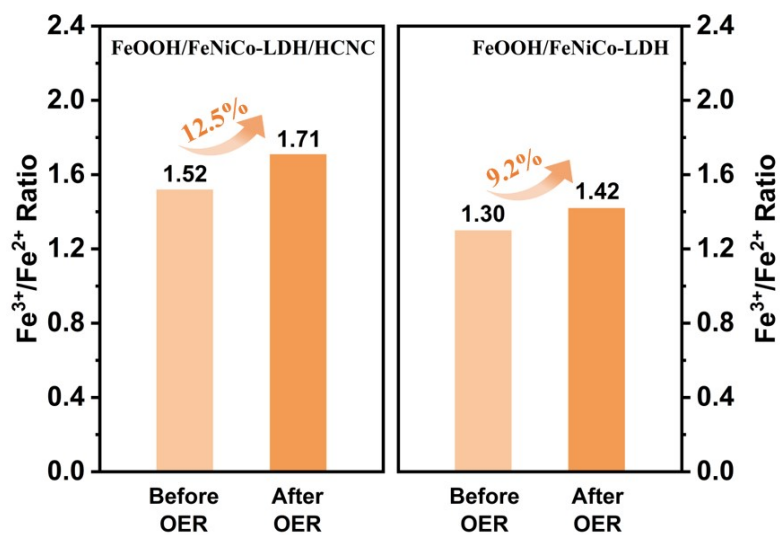

**Fig. S31.** Fe<sup>3+</sup>/Fe<sup>2+</sup> ratios in FeOOH/FeNiCo-LDH/HCNC and FeOOH/FeNiCo-LDH before/after OER test.

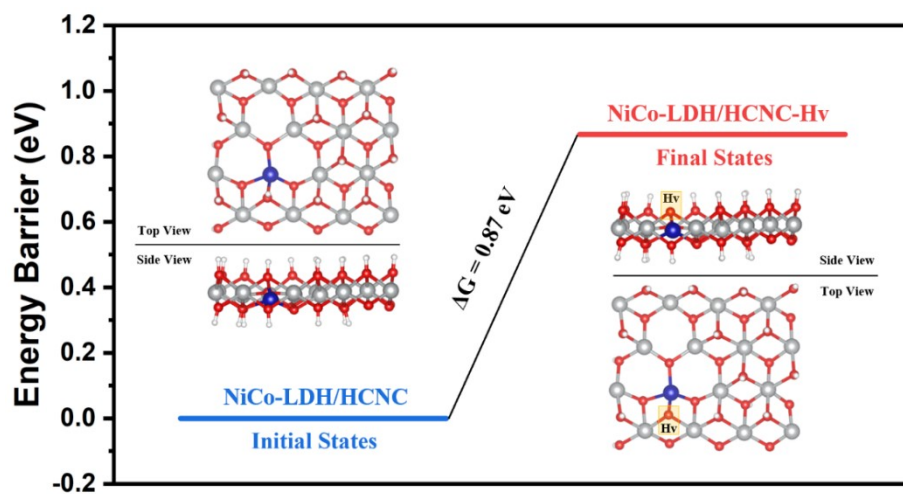

Fig. S32. Calculated energy barrier for the dehydrogenation of NiCo-LDH/HCNC.

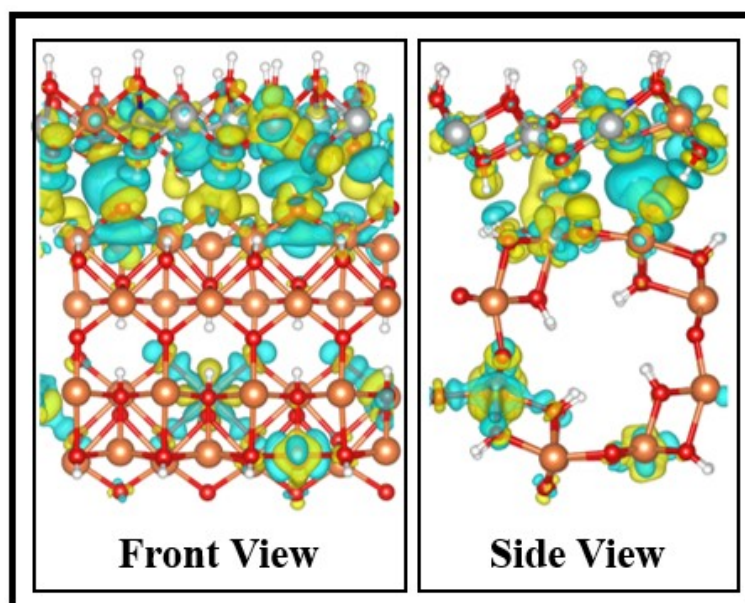

**Fig. S33.** Charge density difference of FeOOH/FeNiCo-LDH before and after the introduction of FeOOH (Isosurface level was set at  $0.02 \text{ e } \text{\AA}^{-3}$ ; The charge accumulation and depletion are denoted by yellow and blue colors, respectively).

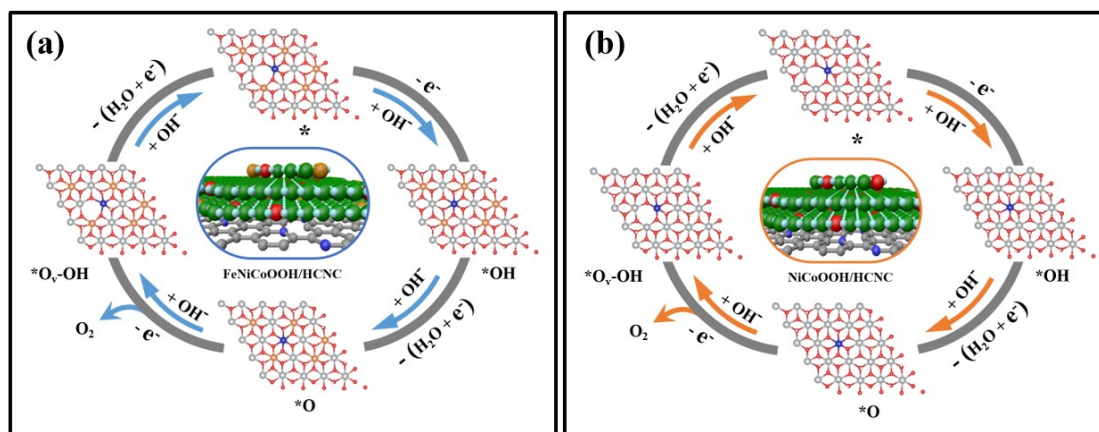

**Fig. S34.** OER pathway with the formation of  $*OH$ ,  $*O$ , and  $*O_v-OH$  intermediates ( $*$  represents active site) on (a) FeNiCoOOH and (b) NiCoOOH.

**Table S1.** ICP-OES of NiCo-LDH/HCNC, FeOOH/FeNiCo-LDH, and FeOOH/FeNiCo-LDH/HCNC.

| <b>Samples</b>               | <b>Fe<br/>(wt%)</b> | <b>Ni<br/>(wt%)</b> | <b>Co<br/>(wt%)</b> |
|------------------------------|---------------------|---------------------|---------------------|
| <b>FeOOH/FeNiCo-LDH/HCNC</b> | 7.25                | 30.02               | 1.40                |
| <b>FeOOH/FeNiCo-LDH</b>      | 6.32                | 40.62               | 3.19                |
| <b>NiCo-LDH/HCNC</b>         | —                   | 33.88               | 2.16                |



**Table S2.** Binding energies of Ni 2p in FeOOH/FeNiCo-LDH/HCNC and its comparative samples.

|                              | Ni 2p <sub>3/2</sub> |                  |       | Ni 2p <sub>1/2</sub> |                  |       |
|------------------------------|----------------------|------------------|-------|----------------------|------------------|-------|
|                              | Ni <sup>2+</sup>     | Ni <sup>3+</sup> | Sat.  | Ni <sup>2+</sup>     | Ni <sup>3+</sup> | Sat.  |
| <b>FeOOH/FeNiCo-LDH/HCNC</b> | 856.4                | 857.5            | 862.2 | 874.0                | 875.4            | 880.4 |
| <b>FeOOH/FeNiCo-LDH</b>      | 856.2                | 857.3            | 862.0 | 873.9                | 875.1            | 880.2 |
| <b>NiCo-LDH/HCNC</b>         | 856.1                | 857.1            | 861.9 | 873.8                | 874.9            | 880.1 |

**Table S3.** Binding energies of Co 2p in FeOOH/FeNiCo-LDH/HCNC and its comparative samples.

|                              | Co 2p <sub>3/2</sub> |                  |       | Co 2p <sub>1/2</sub> |                  |       |
|------------------------------|----------------------|------------------|-------|----------------------|------------------|-------|
|                              | Co <sup>3+</sup>     | Co <sup>2+</sup> | Sat.  | Co <sup>3+</sup>     | Co <sup>2+</sup> | Sat.  |
| <b>FeOOH/FeNiCo-LDH/HCNC</b> | 776.4                | 782.4            | 788.4 | 797.4                | 798.5            | 805.1 |
| <b>FeOOH/FeNiCo-LDH</b>      | 776.2                | 782.1            | 786.8 | 796.8                | 797.8            | 804.3 |
| <b>NiCo-LDH/HCNC</b>         | 776.1                | 782.0            | 788.6 | 796.5                | 797.8            | 804.8 |

**Table S4.** Comparison of the electrocatalytic performance for OER of various electrocatalysts in 1.0 M KOH electrolyte.

| Electrocatalysts                                                       | Substrate* | Tafel<br>(mV dec <sup>-1</sup> ) | $\eta_{10}$<br>(mV) | $\eta_{100}$<br>(mV) | Ref.                                       |
|------------------------------------------------------------------------|------------|----------------------------------|---------------------|----------------------|--------------------------------------------|
| (Fe,Co)OOH/MI                                                          | NF         | 73                               | 230                 | 290                  | Adv. Mater. 2022, 34, 2200270              |
| B-CoSe <sub>2</sub> @CoNi LDH HNA                                      | CC         | 55                               | 240                 | 320                  | Adv. Sci. 2022, 9, 2104522                 |
| S-FeOOH/IF                                                             | IF         | 59                               | 244                 | 308                  | Adv. Funct. Mater. 2022, 32, 2112674       |
| Co-C@NiFe LDH                                                          | GC         | 57.9                             | 249                 | 328                  | Chem. Eng. J. 2021, 415, 128879            |
| H <sub>2</sub> PO <sub>2</sub> <sup>-</sup> /FeNi-LDH-V <sub>2</sub> C | GC         | 46.5                             | 250                 | 310                  | Appl. Catal. B 2021, 297, 120474           |
| Co@NiFe-LDH                                                            | GC         | 44                               | 253                 | 320                  | J. Mater. Chem. A 2022, 10, 5244           |
| CoNiRu-NT                                                              | NF         | 67                               | 255(20)             | 335                  | Adv. Mater. 2022, 34, 2107488              |
| CoNiFe-LDH Nanocages                                                   | GC         | 31.4                             | 257                 | 350                  | Adv. Funct. Mater. 2023, 2300808           |
| <b>FeOOH/FeNiCo-LDH/HCNC</b>                                           | <b>GC</b>  | <b>32.4</b>                      | <b>258</b>          | <b>299</b>           | <b>This work</b>                           |
| CN-5Fe HMs                                                             | GC         | 48.7                             | 258                 | 340                  | Adv. Funct. Mater. 2022, 32, 2200726       |
| Mo-NiCo LDHs(Vo)                                                       | NF         | 94.5                             | 258                 | 361                  | Chem. Eng. J. 2023, 463, 142396            |
| NiFeCe-LDH/MXene                                                       | GC         | 42.8                             | 260                 | 470                  | J. Energy Chem. 2021, 52, 412              |
| Ni <sub>3</sub> S <sub>4</sub> @CoFe-LDH                               | GC         | 70.2                             | 262                 | —                    | J. Mater. Chem. A 2023, 11, 16349          |
| CoVru LDH                                                              | NF         | 74.5                             | 263(25)             | 325                  | Chem. Eng. J. 2023, 452, 139151            |
| NiCo LDH-TPA                                                           | GF         | 52.4                             | 267                 | —                    | Angew. Chem. Int. Ed. 2021, 60, 10614      |
| FeCoNi-LDHs                                                            | GC         | 42.34                            | 269                 | —                    | Adv. Energy Mater. 2021, 11, 2102141       |
| Co <sub>0.50</sub> Fe <sub>0.50</sub> -LDH                             | CC         | 64.6                             | 270                 | 359                  | ACS Catal. 2023, 13, 1477                  |
| Ag NW@NiMnLDH                                                          | GC         | 40.2                             | 270                 | —                    | ACS Nano 2020, 14, 1770                    |
| Ni-Fe LDH(60%)/H-Ti <sub>3</sub> C <sub>2</sub> T <sub>x</sub>         | GC         | 47                               | 270(20)             | 364                  | Carbon 2023, 212, 118141                   |
| NFO/3DGN-10                                                            | NF         | 64                               | 272                 | —                    | Carbon 2022, 200, 422                      |
| Ru@NiV-LDH                                                             | CC         | 60                               | 272                 | —                    | J. Mater. Chem. A 2022, 10, 3618           |
| NiCoFe-HO@NiCo-LDH YSMRs                                               | GC         | 49.7                             | 278                 | 360                  | Angew. Chem. Int. Ed. 2022, 61, e202213049 |
| ZnCoCH@Ti <sub>3</sub> C <sub>2</sub> T <sub>x</sub>                   | GC         | 46.2                             | 280                 | —                    | Chem. Eng. J. 2023, 456, 141041            |
| Ni-Fe LDH Hollow Nanoprisms                                            | GC         | 49.4                             | 280                 | 330                  | Angew. Chem. Int. Ed. 2018, 57, 172        |
| $\gamma$ -FeOOH/NF-6M                                                  | NF         | 51                               | 286                 | 316                  | Adv. Mater. 2021, 33, 2005587              |
| NiCo <sub>2</sub> S <sub>4</sub> @NiFe LDH                             | GC         | 86.4                             | 287                 | —                    | Appl. Catal. B 2021, 286, 119869           |
| NiCo-LDH/GO-CNTs                                                       | GC         | 66.8                             | 290                 | —                    | Nano Res. 2021, 14, 4783                   |
| FeCoNi-ATNs/NF                                                         | NF         | 52.7                             | 295                 | 360                  | Adv. Energy Mater. 2019, 9, 1901312        |
| NiFe-LDH/Fe <sub>1</sub> -N-C                                          | GC         | 41                               | 320                 | —                    | Adv. Energy Mater. 2023, 13, 2203609       |
| 5% Ce-doped Co-Ni LDH                                                  | GC         | 130                              | 340                 | —                    | ACS Catal. 2023, 13, 4799                  |

\* Glassy carbon (GC), Carbon cloth (CC), Carbon paper (CP), Iron foam (IF), Nickel foam (NF), Graphene foam (GF).

**Table S5.** Comparison of the electrocatalytic performance for OER of various electrocatalysts in 1.0 M KOH + 0.5 M NaCl or 1.0 M KOH + seawater electrolytes.

| Electrocatalysts                                           | Substrate* | Electrolyte | Tafel<br>(mV dec <sup>-1</sup> ) | $\eta_{10}$<br>(mV) | $\eta_{100}$<br>(mV) | Ref.                                        |
|------------------------------------------------------------|------------|-------------|----------------------------------|---------------------|----------------------|---------------------------------------------|
| FeOOH/FeNiCo-LDH/HCNC                                      | GC         | 1.0 M KOH   | 34.8                             | 270                 | 316                  | This work                                   |
|                                                            |            | 0.5 M NaCl  |                                  |                     |                      |                                             |
|                                                            |            | 1.0 M KOH   | 54.7                             | 296                 | 377                  |                                             |
|                                                            |            | Seawater    |                                  |                     |                      |                                             |
| NiCoHPi@Ni <sub>3</sub> N/NF                               | NF         | 1.0 M KOH   | 80.8                             | 310(20)             | 365                  | ACS Appl. Mater. Interfaces 2022, 14, 22061 |
|                                                            |            | 0.5 M NaCl  |                                  |                     |                      |                                             |
|                                                            |            | 1.0 M KOH   | 108.6                            | 325(20)             | 396                  |                                             |
|                                                            |            | Seawater    |                                  |                     |                      |                                             |
| (Ni, Fe)OOH@Ni <sub>x</sub> P                              | NF         | 1.0 M KOH   | 34                               | 216                 | 252                  | Appl. Catal. B 2023, 336, 122926            |
|                                                            |            | 0.5 M NaCl  |                                  |                     |                      |                                             |
|                                                            |            | 1.0 M KOH   | 44                               | 216                 | 262                  |                                             |
|                                                            |            | Seawater    |                                  |                     |                      |                                             |
| S-(Ni,Fe)OOH                                               | NF         | 1.0 M KOH   | —                                | —                   | 278                  | Energy Environ. Sci. 2020, 13, 3439         |
|                                                            |            | 0.5 M NaCl  |                                  |                     |                      |                                             |
|                                                            |            | 1.0 M KOH   | —                                | —                   | 300                  |                                             |
|                                                            |            | Seawater    |                                  |                     |                      |                                             |
| NiIr-LDH                                                   | NF         | 1.0 M KOH   | 60.5                             | —                   | 286                  | J. Am. Chem. Soc. 2022, 144, 9254           |
|                                                            |            | 0.5 M NaCl  |                                  |                     |                      |                                             |
|                                                            |            | 1.0 M KOH   | 78.8                             | —                   | 315                  |                                             |
|                                                            |            | Seawater    |                                  |                     |                      |                                             |
| 0.5Fe-NiCo <sub>2</sub> O <sub>4</sub> @CC                 | CC         | 1.0 M KOH   | 76.7                             | 273                 | 330                  | Small 2022, 18, 2106187                     |
|                                                            |            | 0.5 M NaCl  |                                  |                     |                      |                                             |
|                                                            |            | 1.0 M KOH   | 76.1                             | 293                 | 360                  |                                             |
|                                                            |            | Seawater    |                                  |                     |                      |                                             |
| Co-N,P-HCS                                                 | NF         | 1.0 M KOH   | 121.5                            | 320                 | 490                  | Adv. Mater. 2022, 34, 2204021               |
|                                                            |            | Seawater    |                                  |                     |                      |                                             |
| Ni <sub>2</sub> P-Fe <sub>2</sub> P/NF                     | NF         | 1.0 M KOH   | —                                | 240                 | 305                  | Adv. Funct. Mater. 2020, 31, 2006484        |
|                                                            |            | Seawater    |                                  |                     |                      |                                             |
| CoP <sub>x</sub> @FeOOH                                    | NF         | 1.0 M KOH   | 50.3                             | 235                 | 283                  | Appl. Catal. B 2021, 294, 120256            |
|                                                            |            | Seawater    |                                  |                     |                      |                                             |
| Co <sub>1.98</sub> -NiFe LDH                               | CFP        | 1.0 M KOH   | —                                | 254(20)             | 309                  | Appl. Catal. B 2022, 314, 121491            |
|                                                            |            | 0.5 M NaCl  |                                  |                     |                      |                                             |
| Pt-CoFe(II) LDHs                                           | NF         | 1.0 M KOH   | —                                | 239                 | 302                  | J. Power Sources 2022, 532, 231353          |
|                                                            |            | Seawater    |                                  |                     |                      |                                             |
| B-Co <sub>2</sub> Fe LDH                                   | NF         | 1.0 M KOH   | 63.8                             | 245                 | 310                  | Nano Energy 2021, 83, 105838                |
|                                                            |            | Seawater    |                                  |                     |                      |                                             |
| Fe-Ni(OH) <sub>2</sub> /Ni <sub>3</sub> S <sub>2</sub> @NF | NF         | 1.0 M KOH   | 46                               | 269                 | 320                  | Nano Res. 2021, 14, 1149                    |
|                                                            |            | 0.5 M NaCl  |                                  |                     |                      |                                             |

\* Glassy carbon (GC), Cu foil (CF), Nickel foam (NF), Carbon fiber paper (CFP), Nickel-iron foam (NFF), Carbon cloth (CC).

**Table S6.** Comparison of AEM performance for water electrolysis of various electrocatalysts in 1.0 M KOH electrolyte.

| Electrocatalysts                                                   | Temp<br>(°C) | Area<br>(cm <sup>2</sup> ) | Electrolyte      | Stability<br>(mA cm <sup>-2</sup> @V) | Degradation<br>Rate         | Ref                                       |
|--------------------------------------------------------------------|--------------|----------------------------|------------------|---------------------------------------|-----------------------------|-------------------------------------------|
| <b>FeOOH/FeNiCo-LDH/HCNC</b>                                       | <b>65</b>    | <b>1</b>                   | <b>1.0 M KOH</b> | <b>500@1.95</b>                       | <b>1.7 mV/h<br/>(120 h)</b> | <b>This work</b>                          |
| NiCoO-NiCo/C                                                       | 50           | 64                         | 1.0 M KOH        | 440@1.85                              | 4.6 mV/h<br>(10 h)          | Appl. Catal. B 2021,<br>292, 120170       |
| Fe <sub>2</sub> O <sub>3</sub> /NiSe <sub>2</sub> -FeOOH/NF        | 25           | 2                          | 1.0 M KOH        | 500@1.80                              | 1.5 mV/h<br>(75 h)          | Appl. Catal. B 2024,<br>355, 124148       |
| NiFeCr-LDH                                                         | 40           | 1.2                        | 1.0 M KOH        | 1000@2.11                             | (50 h)                      | Small 2022, 18,<br>2200303                |
| Ni <sub>2</sub> P/Ni <sub>7</sub> S <sub>6</sub>                   | 75           | 1                          | 1.0 M KOH        | 1000@2.50                             | 1.9 mV/h<br>(140 h)         | Appl. Catal. B 2023,<br>330, 122633       |
| Ni <sub>3</sub> S <sub>2</sub> /Cr <sub>2</sub> S <sub>3</sub> @NF | 60           | 1.2                        | 3.0 M KOH        | 1000@2.16                             | 1.7 mV/h<br>(35 h)          | J. Am. Chem. Soc.<br>2022, 144, 6028      |
| FeNiPt@C                                                           | 60           | 4                          | 1.0 M KOH        | 200@1.67                              | 1.1 mV/h<br>(110 h)         | Adv. Sci. 2024, 11,<br>2308205            |
| RuZn-Co <sub>3</sub> O <sub>4</sub>                                | 60           | 4                          | 1.0 M KOH        | 500@1.75                              | 1.3 mV/h<br>(100 h)         | Angew. Chem. Int. Ed.<br>2024, e202407509 |
| L <sub>2</sub> S <sub>2</sub> N <sub>1</sub> F <sub>2</sub>        | 60           | 3.8                        | 1.0 M KOH        | 500@1.70                              | 3.0 mV/h<br>(40 h)          | Chem. Eng. J. 2023,<br>452, 139105        |
| (FeCoNiCrMnCu) <sub>3</sub> O <sub>4</sub>                         | 50           | 1                          | 1.0 M NaOH       | 500@1.68                              | 2.0 mV/h<br>(40 h)          | ACS Materials Lett.<br>2024, 6, 1739      |
| F-TMO                                                              | 70           | 5                          | Pure water       | 500@1.82                              | 2.5 mV/h<br>(336 h)         | ACS Nano 2024, 18,<br>22454               |
| FePi-NiS/NF                                                        | 50           | 25                         | 1.0 M KOH        | 500@1.87                              | 3.0 mV/h<br>(30 h)          | Appl. Catal. B 2024,<br>340, 123252       |
| d-(Fe,Ni)OOH                                                       | 73           | 25                         | 1.0 M KOH        | 500@1.80                              | (96 h)                      | Adv. Mater. 2023, 35,<br>2306097          |
| NiFe LDH/NiS                                                       | 85           | 20                         | 30% KOH          | 400@2.02                              | (80 h)                      | Adv. Energy Mater.<br>2021, 11, 2102353   |
| NiCoFe-NDA                                                         | 50           | 4                          | 0.1 M KOH        | 325@1.80                              | (75 h)                      | Energy Environ. Sci.<br>2021, 14, 6546    |
| Co, Mo-NiFe LDH                                                    | 85           | 4                          | 30% KOH          | 500@1.94                              | (130 h)                     | Adv. Energy Mater.<br>2023, 13, 2203595   |
| Fe/S-NiOOH                                                         | 60           | 1                          | 1.0 M KOH        | 1000@2.65                             | (100 h)                     | Small 2024, 2310064                       |

CoCrOx      60      5      1.0 M KOH      500@2.00      (120 h)      Nat. Commun. 2024,  
15, 3416

---

## Reference

- [S1] J. Hafner, *J. Comput. Chem.*, 2008, 29, 2044-2078.
- [S2] P. E. Blöchl, *Phys. Rev. B*, 1994, 50, 17953-17979.
- [S3] J. P. Perdew and K. Burke, *Phys. Rev. Lett.*, 1996, 77, 3865-3868.
- [S4] S. Grimme, *J. Comput. Chem.*, 2006, 27, 1787-1799.
- [S5] H. J. Monkhorst and J. D. Pack, *Phys. Rev. B*, 1976, 13, 5188-5192.
- [S6] V. I. Anisimov, J. Zaanen and O. K. Andersen, *Phys. Rev. B*, 1991, 44, 943-954.
- [S7] V. I. Anisimov, F. Aryasetiawan and A. I. Lichtenstein, *J. Phys. Condens. Matter*, 1997, 9, 767-808.
- [S8] L. Wang, T. Maxisch and G. Ceder, *Phys. Rev. B*, 2006, 73, 195107.
- [S9] E. Skúlason, G. S. Karlberg, J. Rossmeisl, T. Bligaard, J. Greeley, H. Jónsson and J. K. Nørskov, *Phys. Chem. Chem. Phys.*, 2007, 9, 3241-3250.
- [S10] B. Zhang, X. Zheng, O. Voznyy, R. Comin, M. Bajdich, M. García-Melchor, L. Han, J. Xu, M. Liu, L. Zheng, F. P. G. de Arquer, C. T. Dinh, F. Fan, M. Yuan, E. Yassitepe, N. Chen, T. Regier, P. Liu, Y. Li, P. De Luna, A. Janmohamed, H. L. Xin, H. Yang, A. Vojvodic and E. H. Sargent, *Science*, 2016, 352, 333-337.
- [S11] W. M. Haynes, D. R. Lide and T. J. Bruno, *CRC handbook of chemistry and physics 97th Edition*, 2016.
- [S12] V. Wang, N. Xu, J.-C. Liu, G. Tang and W.-T. Geng, *Comput. Phys. Commun.*, 2021, 267, 108033.
